# Supplementary material for: Comparative 3D Genome Structure Analysis of the Fission and the Budding Yeast
Source: PubMed Central journal article supplement (PMC4370715; doi:10.1371/journal.pone.0119672), 2015-03-23
Supplement: pone.0119672.s007.pdf [file pone.0119672.s007.pdf]

| No. | Label      | Number Of Genes in Fission Yeast | Number Of Genes in Budding Yeast | Function Category  |
|-----|------------|----------------------------------|----------------------------------|--------------------|
| 1   | GO:0005886 | 136                              | 401                              | Cellular Component |
| 2   | GO:0005794 | 268                              | 102                              | Cellular Component |
| 3   | GO:0005730 | 309                              | 247                              | Cellular Component |
| 4   | GO:0000329 | 84                               | 139                              | Cellular Component |
| 5   | GO:0022625 | 82                               | 82                               | Cellular Component |
| 6   | GO:0005643 | 52                               | 57                               | Cellular Component |
| 7   | GO:0005576 | 53                               | 91                               | Cellular Component |
| 8   | GO:0000139 | 125                              | 94                               | Cellular Component |
| 9   | GO:0031965 | 82                               | 65                               | Cellular Component |
| 10  | GO:0022627 | 58                               | 62                               | Cellular Component |
| 11  | GO:0005816 | 64                               | 54                               | Cellular Component |
| 12  | GO:0005759 | 80                               | 105                              | Cellular Component |
| 13  | GO:0005635 | 94                               | 58                               | Cellular Component |
| 14  | GO:0030479 | 51                               | 59                               | Cellular Component |
| 15  | GO:0005789 | 277                              | 254                              | Cellular Component |
| 16  | GO:0005743 | 104                              | 155                              | Cellular Component |
| 17  | GO:0016020 | 53                               | 107                              | Cellular Component |
| 18  | GO:0006508 | 69                               | 79                               | Biological Process |
| 19  | GO:0002181 | 154                              | 163                              | Biological Process |
| 20  | GO:0000122 | 78                               | 80                               | Biological Process |
| 21  | GO:0043161 | 54                               | 53                               | Biological Process |
| 22  | GO:0006468 | 105                              | 122                              | Biological Process |
| 23  | GO:0006338 | 133                              | 73                               | Biological Process |
| 24  | GO:0016567 | 98                               | 62                               | Biological Process |
| 25  | GO:0006364 | 130                              | 105                              | Biological Process |
| 26  | GO:0045944 | 72                               | 156                              | Biological Process |
| 27  | GO:0007126 | 56                               | 84                               | Biological Process |
| 28  | GO:0006888 | 73                               | 77                               | Biological Process |
| 29  | GO:0032543 | 113                              | 88                               | Biological Process |
| 30  | GO:0006281 | 98                               | 99                               | Biological Process |
| 31  | GO:0006457 | 82                               | 91                               | Biological Process |
| 32  | GO:0006897 | 56                               | 85                               | Biological Process |
| 33  | GO:0006355 | 151                              | 129                              | Biological Process |
| 34  | GO:0016192 | 71                               | 63                               | Biological Process |
| 35  | GO:0030437 | 79                               | 53                               | Biological Process |
| 36  | GO:0055085 | 102                              | 95                               | Biological Process |

|           |            |     |     |                    |
|-----------|------------|-----|-----|--------------------|
| <b>37</b> | GO:0015031 | 62  | 182 | Biological Process |
| <b>38</b> | GO:0006357 | 125 | 64  | Biological Process |
| <b>39</b> | GO:0006886 | 153 | 60  | Biological Process |
| <b>40</b> | GO:0004842 | 70  | 69  | Molecular Function |
| <b>41</b> | GO:0003677 | 225 | 197 | Molecular Function |
| <b>42</b> | GO:0016887 | 68  | 71  | Molecular Function |
| <b>43</b> | GO:0003735 | 213 | 217 | Molecular Function |
| <b>44</b> | GO:0051082 | 55  | 87  | Molecular Function |
| <b>45</b> | GO:0003723 | 239 | 232 | Molecular Function |
| <b>46</b> | GO:0003924 | 58  | 71  | Molecular Function |
| <b>47</b> | GO:0000978 | 85  | 86  | Molecular Function |
| <b>48</b> | GO:0004674 | 95  | 101 | Molecular Function |
| <b>49</b> | GO:0001077 | 110 | 63  | Molecular Function |
| <b>50</b> | GO:0008270 | 286 | 312 | Molecular Function |
| <b>51</b> | GO:0005525 | 112 | 98  | Molecular Function |
