# Supplementary material for: Comparative 3D Genome Structure Analysis of the Fission and the Budding Yeast
Source: PubMed Central journal article supplement (PMC4370715; doi:10.1371/journal.pone.0119672), 2015-03-23
Supplement: pone.0119672.s008.pdf [file pone.0119672.s008.pdf]

|                      | <i>Fission Yeast</i>                     |                                          |                                         |
|----------------------|------------------------------------------|------------------------------------------|-----------------------------------------|
|                      |                                          | <i>Smaller Pairwise Genomic Distance</i> | <i>Larger Pairwise Genomic Distance</i> |
| <i>Budding Yeast</i> | <i>Smaller Pairwise Genomic Distance</i> | 31                                       | 3                                       |
|                      | <i>Larger Pairwise Genomic Distance</i>  | 11                                       | 5                                       |
